# Supplementary material for: Electro-Acupuncture at Neiguan Pretreatment Alters Genome-Wide Gene Expressions and Protects Rat Myocardium against Ischemia-Reperfusion
Source: PubMed Central journal article supplement (PMC6271995; doi:10.3390/molecules191016158), 2014-10-09
Supplement: molecules-19-16158-s001.pdf [file molecules-19-16158-s001.pdf]

# Supplementary Materials

**Figure S1.** Multidimensional scaling (MDS) plot, MDS plot of samples based on genes show the relative similarities of samples to differentially expressed among four groups.

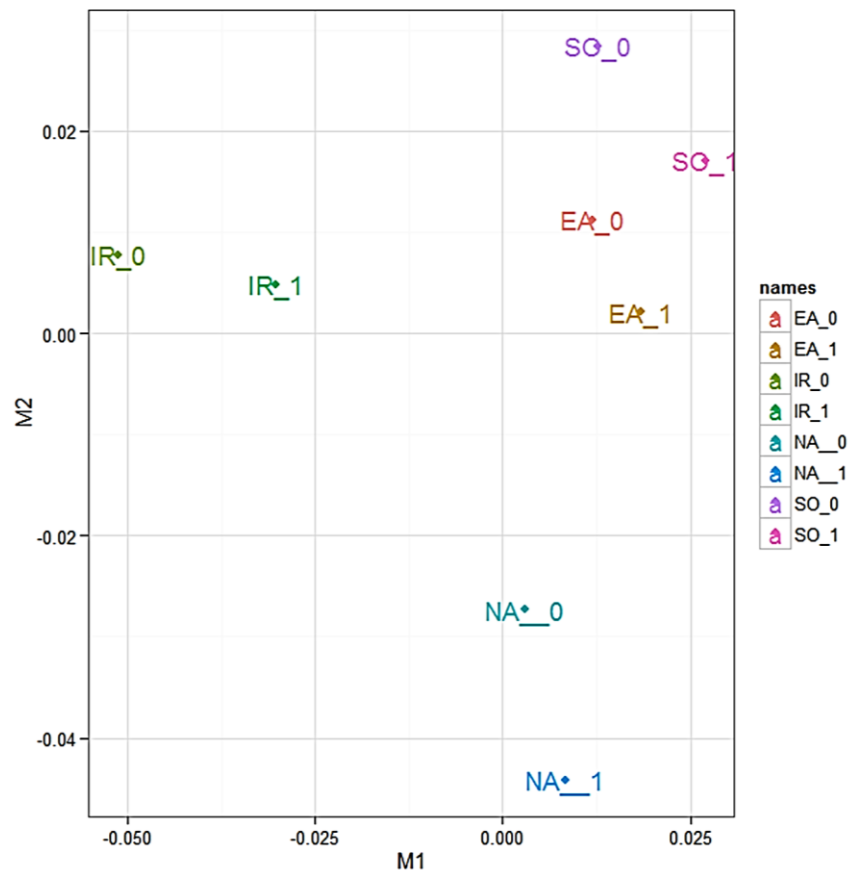

**Figure S2.** RNA integrity number (RIN) value.

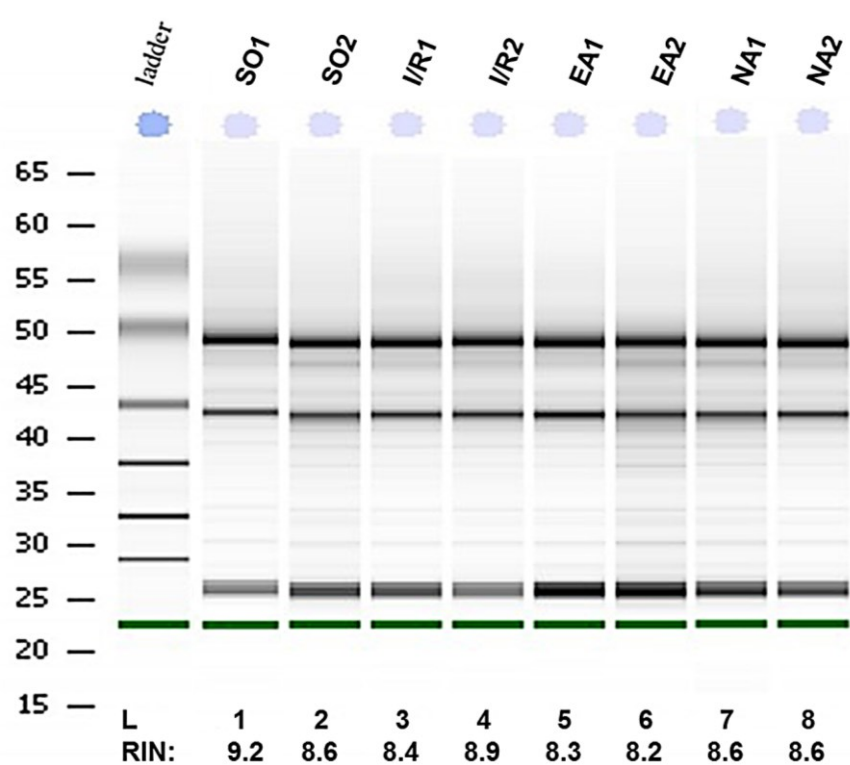

**Table S1.** Genes up-regulated in I/R group and down-regulated in EA group.

| Pathway                            | Genes                                                                                                                   |
|------------------------------------|-------------------------------------------------------------------------------------------------------------------------|
| Parkinson's disease                | SEPT5, ATP5D, NDUFB7, NDUFB8, NDUFA7, CYC1, ATP5G2, ATP5G1, COX5B, ATP5G3, VDAC3, NDUFB2, NDUFS7, GP1BB, NDUFS8, COX6A1 |
| Oxidative phosphorylation          | ATP5D, NDUFB7, NDUFB8, NDUFA7, CYC1, ATP5G2, ATP5G1, COX5B, ATP5G3, NDUFB2, NDUFS7, NDUFS8, COX6A1, ATP5L               |
| Huntington's disease               | ATP5D, NDUFB7, NDUFB8, NDUFA7, CYC1, ATP5G2, ATP5G1, COX5B, ATP5G3, VDAC3, NDUFB2, NDUFS7, NDUFS8, COX6A1               |
| Alzheimer's disease                | ATP5D, NDUFB7, NDUFB8, NDUFA7, CYC1, ATP5G2, ATP5G1, COX5B, ATP5G3, NDUFB2, NDUFS7, NDUFS8, COX6A1, CACNA1C             |
| Focal adhesion                     | CAV3, PGF, BCAR1, COL5A3, FLNC, COL5A1, MYL9, VEGFB, LAMA5, COL6A2, COL1A2, RHOC, COL1A1                                |
| Cardiac muscle contraction         | ACTC1, MYL3, CYC1, COX6A1, MYH6, TNNI3, CACNA1C, COX5B                                                                  |
| ECM-receptor interaction           | SEPT5, GP1BB, LAMA5, COL1A2, COL6A2, COL1A1, COL5A3, COL5A1, SDC3                                                       |
| MAPK signaling pathway             | MAP2K3, HSPA1B, FLNC, CDC25B, DUSP5, DUSP14, GADD45G, JUND, HSPB1, CACNA1C, NFATC2, PLA2G5                              |
| Gap junction                       | TUBB5, TUBB6, TUBA4A, TUBA1B, TUBA1C, TUBB3                                                                             |
| Vascular smooth muscle contraction | KCNMB4, ACTC1, ADORA2A, RHOC, CACNA1C, PLA2G5, MYL9                                                                     |
| Hypertrophic cardiomyopathy        | ACTC1, MYL3, MYH6, TNNI3, CACNA1C                                                                                       |

**Table S2.** Genes down-regulated in I/R group and up-regulated in EA group.

| Pathway                                   | Genes                                               |
|-------------------------------------------|-----------------------------------------------------|
| NOD-like receptor signaling pathway       | CCL12, XIAP, IL18, CASP1, CARD6, CHUK               |
| Cytosolic DNA-sensing pathway             | TBK1, IL18, IL33, CASP1, CHUK                       |
| p53 signaling pathway                     | CCNE2, IGF1, RRM2B, PTEN, SESN3                     |
| Leukocyte transendothelial migration      | VCAM1, CYBB, GNAI1, RAP1B, JAM2, PIK3R1             |
| Small cell lung cancer                    | CCNE2, XIAP, PTEN, CHUK, PIK3R1                     |
| Apoptosis                                 | TNFSF10, XIAP, IL1RAP, CHUK, PIK3R1                 |
| Prostate cancer                           | CCNE2, IGF1, PTEN, CHUK, PIK3R1                     |
| Natural killer cell mediated cytotoxicity | CD48, TNFSF10, CD244, FCGR2B, PIK3R1                |
| Cytokine-cytokine receptor interaction    | TNFSF10, CXCL13, IL18, IL1RAP, LIFR, KITLG, IL13RA1 |
| Long-term depression                      | GNAQ, GNAI1, IGF1, GUCY1B3                          |
| Adipocytokine signaling pathway           | CD36, ACSL4, ACSL3, CHUK                            |
| B cell receptor signaling pathway         | FCGR2B, RASGRP3, CHUK, PIK3R1                       |

**Table S3.** Genes down-regulated in I/R group and up-regulated in NA group.

| Pathway                                   | Genes                                  |
|-------------------------------------------|----------------------------------------|
| Apoptosis                                 | TNFSF10, XIAP, IL1RAP, PIK3R1          |
| Natural killer cell mediated cytotoxicity | TNFSF10, CD244, FCGR2B, PIK3R1         |
| Cytokine-cytokine receptor interaction    | TNFSF10, CXCL13, IL1RAP, LIFR, IL13RA1 |
| Leukocyte transendothelial migration      | VCAM1, CYBB, RAP1B, PIK3R1             |
| Renal cell carcinoma                      | HIF1A, RAP1B, PIK3R1                   |

**Table S4.** Genes up-regulated in I/R group and down-regulated in NA group.

| Pathway                      | Genes                                |
|------------------------------|--------------------------------------|
| ECM-receptor interaction     | SEPT5, GP1BB, COL1A1, COL5A3, COL5A1 |
| Parkinson's disease          | SEPT5, GP1BB, COX5B, VDAC3, NDUFB2   |
| MAPK signaling pathway       | FOS, JUND, NR4A1, FLNC, NFATC2       |
| Keratan sulfate biosynthesis | B3GNT7, CHST1                        |

**Table S5.** Number of total reads and mapped reads.

| Group | Fastq_Name                  | Total Reads | Mapped Reads | %     |
|-------|-----------------------------|-------------|--------------|-------|
| SO_0  | 11_ACTTGA_L002_R1_001.fastq | 39862003    | 37318902     | 93.62 |
| SO_1  | 12_GGCTAC_L003_R1_001.fastq | 40442143    | 37702209     | 93.23 |
| IR_0  | 13_TAGCTT_L002_R1_001.fastq | 30662110    | 28700545     | 93.60 |
| IR_1  | 14_GTGGCC_L003_R1_001.fastq | 43356297    | 40111978     | 92.52 |
| EA_0  | 15_GGCTAC_L002_R1_001.fastq | 41608188    | 38659922     | 92.91 |
| EA_1  | 16_CGTACG_L002_R1_001.fastq | 41844123    | 38578194     | 92.20 |
| NA_0  | 17_GTGGCC_L002_R1_001.fastq | 35675554    | 33309894     | 93.37 |
| NA_1  | 18_CGTACG_L003_R1_001.fastq | 20577495    | 19105240     | 92.85 |

**Table S6.** Primer sequences for Real-time PCR.

| Gene    | Forward Primer (5'-3')      | Reverse Primer (5'-3')        | Tm (°C) | Product (bp) |
|---------|-----------------------------|-------------------------------|---------|--------------|
| Gja1    | CACTAGCCATTGTGGACCAG        | CTAGATCTCCAGGTCATCAGG         | 58      | 158          |
| Vegfb   | CGCGGATCCGCCCTGTCTCCCAGCCTG | CCGGAATTCTAAGCCCCGCCCTTGGCAAC | 60      | 200          |
| Bcl-2   | AACATCGCCCTGTGGATGACTG      | GCTGATTCGACGTTTTGCCTGA        | 56      | 112          |
| Cav3    | GCTGATTCGACGTTTTGCCTGA      | GCTGATTCGACGTTTTGCCTGA        | 62      | 137          |
| Adora1  | TACATTGGCATCGAGGTCCTC ATT   | GAGCTCTGGGTGAGGATGAGGAC       | 54      | 196          |
| Adora2a | TCAGAATTCTAATGGTITACTAA     | TTCAAGCTTGGIACCAIAIGCAA       | 57      | 129          |
| GAPDH   | TGCCCAGAATATCATCCC          | AGGTCAGATCCACAACAG            | 59      | 134          |
